# Supplementary material for: Non-typhoidal Salmonella DNA traces in gallbladder cancer
Source: PubMed Central journal article supplement (PMC4776363; doi:10.1186/s13027-016-0057-x), 2016-03-03
Supplement: 13027_2016_57_MOESM1_ESM.pdf [file 13027_2016_57_MOESM1_ESM.pdf]

| Primer                       |     | 5'-3'                 |
|------------------------------|-----|-----------------------|
| OAD_1275_S typhi F 1st rnd F | ST1 | TATGCCGCTACATATGATGAG |
| OAD_1276_S typhi R 1st rnd R | ST2 | TTAACGCAGTAAAGAGAG    |
| OAD_1277_S typhi F 2nd rnd F | ST3 | AGATGGTACTGGCGTTGCTC  |
| OAD_1278_S typhi F 2nd rnd R | ST4 | TGGAGACTTCGGTCG CGTAG |

Read specific primers

|                          |                       |
|--------------------------|-----------------------|
| OAD 1352 _Stymurium_9T_F | TCGACCAGTGAGCTATTACGC |
| OAD1353 _Stymurium_9T_R  | GCCAGCTAAGGTCCCAAAGT  |
|                          |                       |
| OAD1354 _Stymurium_4T_F  | TCTCTCAAGCGCCTTGGTAT  |
| OAD1355 _Stymurium_4T_R  | CGAGGCACTACTGTGCTGAA  |
|                          |                       |
| OAD1361 _Styphi_15T_F    | CCAGCTCGCGTACCTCTTTA  |
| OAD1362 _Styphi_15T_R    | ATACCGCCCAAGAGGTCATA  |
|                          |                       |
| OAD1359 _Stymurium_1T_F  | CCCACATCGTTTCCCACTTA  |
| OAD1360 _Stymurium_1T_R  | GCGAATTCCGGAGAATGTTA  |
