# Supplementary material for: Non-typhoidal Salmonella DNA traces in gallbladder cancer
Source: PubMed Central journal article supplement (PMC4776363; doi:10.1186/s13027-016-0057-x), 2016-03-03

A

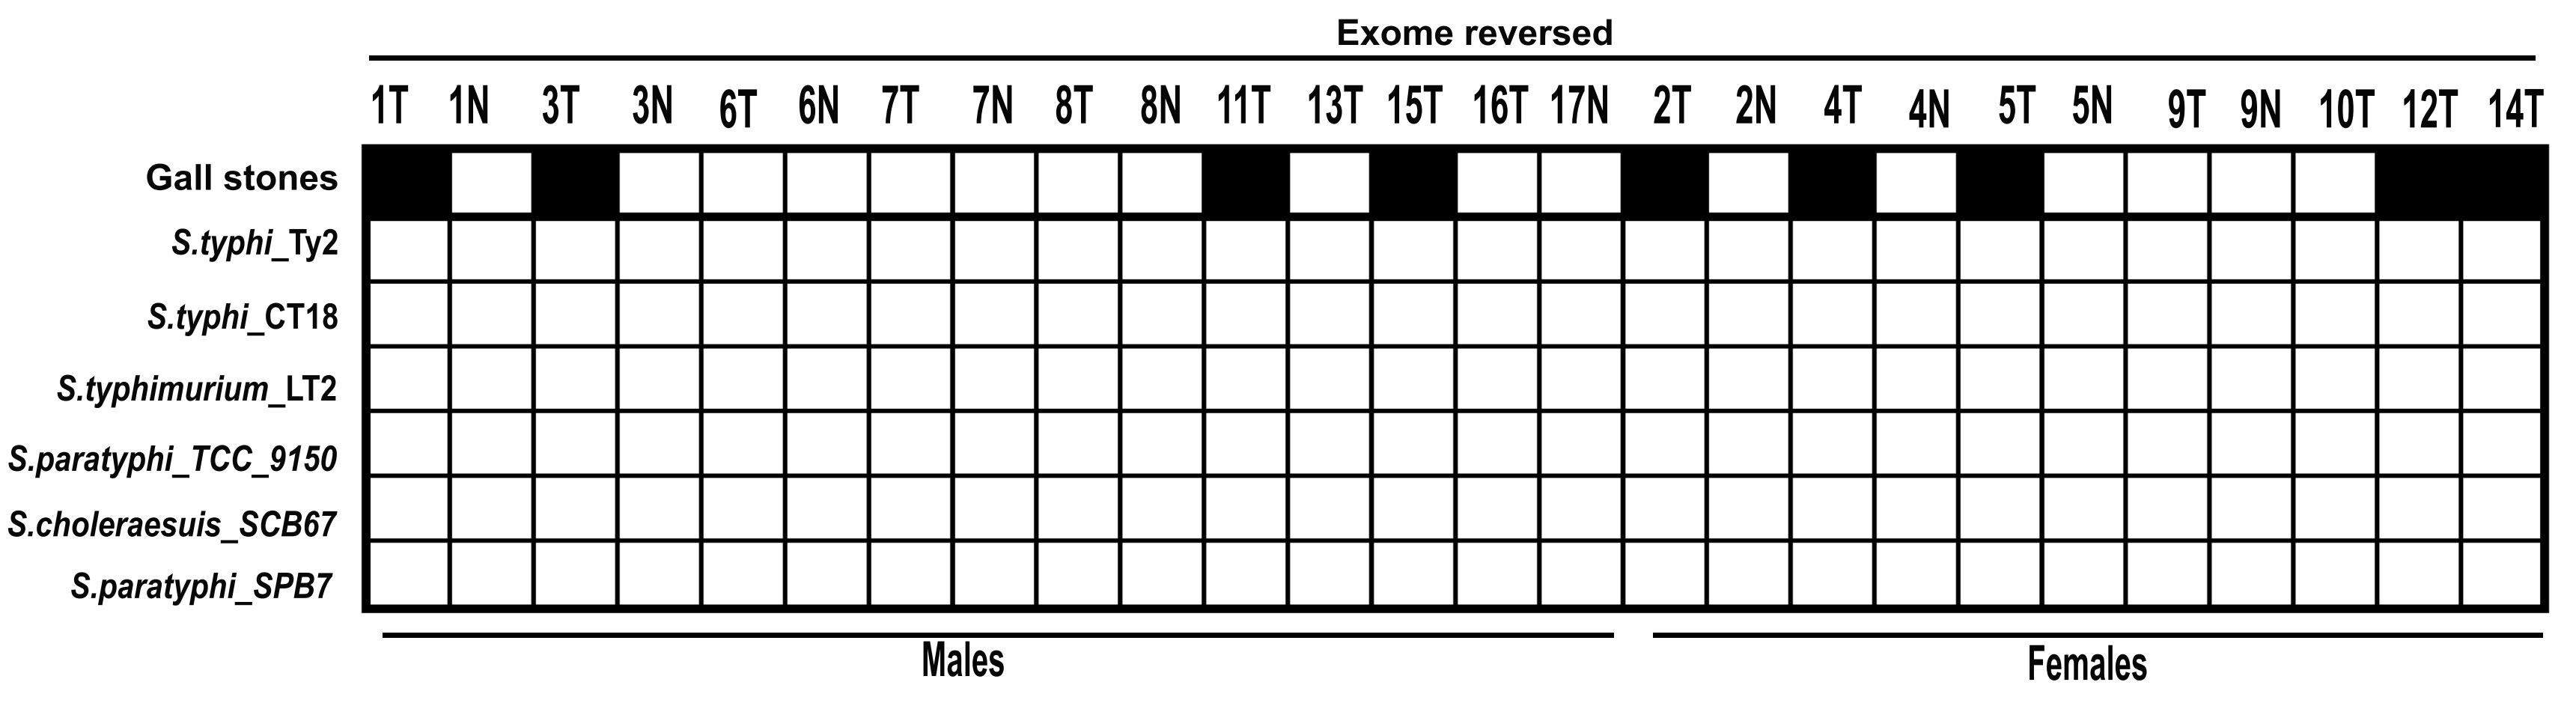

B

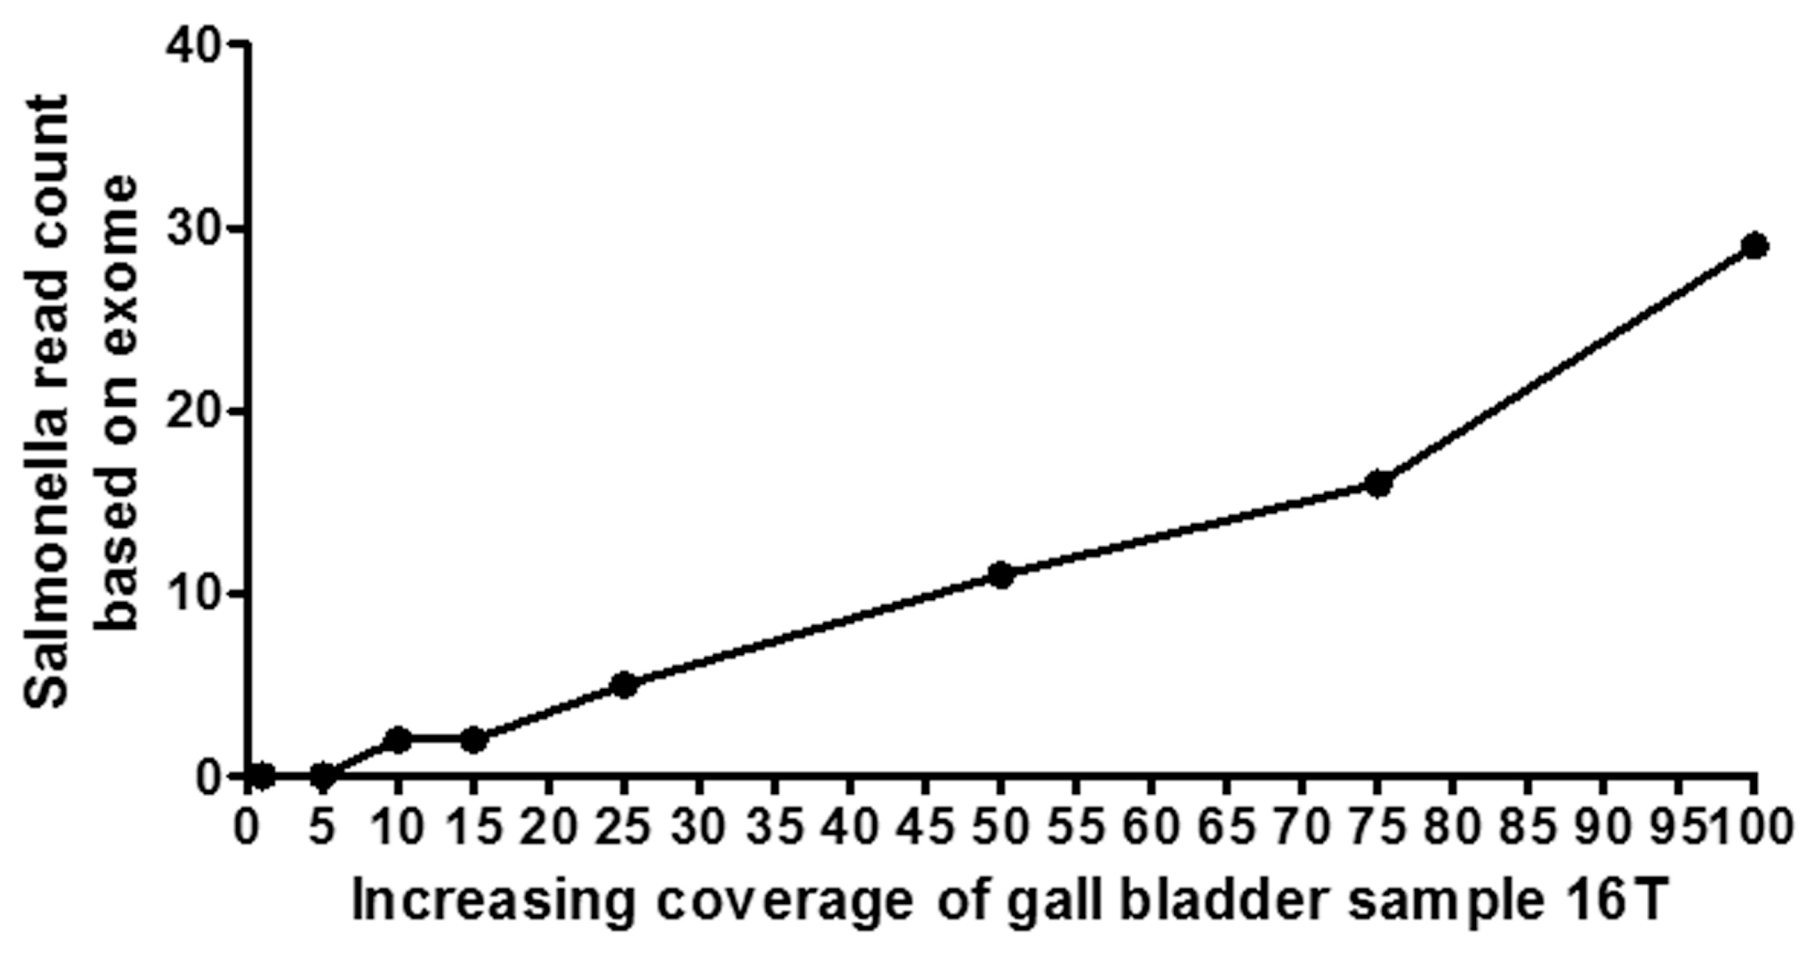

Supplement: 13027_2016_57_MOESM4_ESM.pdf [file 13027_2016_57_MOESM4_ESM.pdf]
