# Supplementary material for: Non-typhoidal Salmonella DNA traces in gallbladder cancer
Source: Infect Agent Cancer. 2016 Mar 3;11:12. doi: 10.1186/s13027-016-0057-x (PMC4776363; doi:10.1186/s13027-016-0057-x)
Supplement: Additional file 2: Figure S1. — Abundance and annotation of Salmonella reads found across the 16 of 26 gall bladder cancer samples. Heat map representation of individual Salmonella reads (in rows) identified from 6 different isolates found across the 16 gall bladder cancer samples (in column) is shown. Variable length and number of overlapping reads, each of 150 bp obtained from paired end Illumina sequence for each isolate, were assembled into contigs based on Clustal X2 multiple alignment. The unique total length of contigs generated is shown in second column reflecting the total length of the gene covered in the study. The contigs generated were annotated based on gene annotation database of Salmonella isolates from NCBI database. A representative general class for all genes identified is shown in the third column. (PDF 11190 kb) [file 13027_2016_57_MOESM2_ESM.pdf]

| <i>Salmonella</i> isolates  |     | Gene Class                                                                                                   | 17N | 8T | 16T | 12T | 1T | 11T | 4T | 5T | 9N | 15T | 9T | 13T | 3N | 4N | 5N | 6N |
|-----------------------------|-----|--------------------------------------------------------------------------------------------------------------|-----|----|-----|-----|----|-----|----|----|----|-----|----|-----|----|----|----|----|
| <i>S.typhi</i> _Ty2         | 158 | 23srRNA genes                                                                                                |     |    |     |     |    |     |    |    |    |     |    |     |    |    |    |    |
|                             | 151 |                                                                                                              |     |    |     |     |    |     |    |    |    |     |    |     |    |    |    |    |
|                             | 151 |                                                                                                              |     |    |     |     |    |     |    |    |    |     |    |     |    |    |    |    |
| <i>S.typhi</i> _CT18        | 151 | Intron                                                                                                       |     |    |     |     |    |     |    |    |    |     |    |     |    |    |    |    |
|                             | 151 | 23srRNA genes                                                                                                |     |    |     |     |    |     |    |    |    |     |    |     |    |    |    |    |
|                             | 158 |                                                                                                              |     |    |     |     |    |     |    |    |    |     |    |     |    |    |    |    |
|                             | 151 |                                                                                                              |     |    |     |     |    |     |    |    |    |     |    |     |    |    |    |    |
|                             | 151 |                                                                                                              |     |    |     |     |    |     |    |    |    |     |    |     |    |    |    |    |
|                             | 185 |                                                                                                              |     |    |     |     |    |     |    |    |    |     |    |     |    |    |    |    |
| <i>S.typhimurium</i> _LT2   | 180 | Intron                                                                                                       |     |    |     |     |    |     |    |    |    |     |    |     |    |    |    |    |
|                             | 151 | 23srRNA genes                                                                                                |     |    |     |     |    |     |    |    |    |     |    |     |    |    |    |    |
|                             | 161 |                                                                                                              |     |    |     |     |    |     |    |    |    |     |    |     |    |    |    |    |
|                             | 204 |                                                                                                              |     |    |     |     |    |     |    |    |    |     |    |     |    |    |    |    |
|                             | 151 |                                                                                                              |     |    |     |     |    |     |    |    |    |     |    |     |    |    |    |    |
|                             | 174 | protein metabolism                                                                                           |     |    |     |     |    |     |    |    |    |     |    |     |    |    |    |    |
|                             | 151 |                                                                                                              |     |    |     |     |    |     |    |    |    |     |    |     |    |    |    |    |
|                             | 207 |                                                                                                              |     |    |     |     |    |     |    |    |    |     |    |     |    |    |    |    |
|                             | 157 |                                                                                                              |     |    |     |     |    |     |    |    |    |     |    |     |    |    |    |    |
| 166                         |     |                                                                                                              |     |    |     |     |    |     |    |    |    |     |    |     |    |    |    |    |
| 190                         |     |                                                                                                              |     |    |     |     |    |     |    |    |    |     |    |     |    |    |    |    |
| <i>S.paratyphi</i> TCC9150  | 151 | Intron                                                                                                       |     |    |     |     |    |     |    |    |    |     |    |     |    |    |    |    |
|                             | 151 | Genes predicted to be involved in metabolism                                                                 |     |    |     |     |    |     |    |    |    |     |    |     |    |    |    |    |
|                             | 151 |                                                                                                              |     |    |     |     |    |     |    |    |    |     |    |     |    |    |    |    |
|                             | 151 |                                                                                                              |     |    |     |     |    |     |    |    |    |     |    |     |    |    |    |    |
|                             | 151 |                                                                                                              |     |    |     |     |    |     |    |    |    |     |    |     |    |    |    |    |
|                             | 152 |                                                                                                              |     |    |     |     |    |     |    |    |    |     |    |     |    |    |    |    |
|                             | 152 |                                                                                                              |     |    |     |     |    |     |    |    |    |     |    |     |    |    |    |    |
|                             | 151 |                                                                                                              |     |    |     |     |    |     |    |    |    |     |    |     |    |    |    |    |
|                             | 151 |                                                                                                              |     |    |     |     |    |     |    |    |    |     |    |     |    |    |    |    |
| 205                         |     |                                                                                                              |     |    |     |     |    |     |    |    |    |     |    |     |    |    |    |    |
| <i>S.choleraesuis</i> SCB67 | 331 | Intron                                                                                                       |     |    |     |     |    |     |    |    |    |     |    |     |    |    |    |    |
|                             | 169 | Pseudogenes                                                                                                  |     |    |     |     |    |     |    |    |    |     |    |     |    |    |    |    |
|                             | 151 |                                                                                                              |     |    |     |     |    |     |    |    |    |     |    |     |    |    |    |    |
|                             | 151 |                                                                                                              |     |    |     |     |    |     |    |    |    |     |    |     |    |    |    |    |
|                             | 151 |                                                                                                              |     |    |     |     |    |     |    |    |    |     |    |     |    |    |    |    |
|                             | 151 |                                                                                                              |     |    |     |     |    |     |    |    |    |     |    |     |    |    |    |    |
|                             | 152 |                                                                                                              |     |    |     |     |    |     |    |    |    |     |    |     |    |    |    |    |
|                             | 151 |                                                                                                              |     |    |     |     |    |     |    |    |    |     |    |     |    |    |    |    |
| 173                         |     |                                                                                                              |     |    |     |     |    |     |    |    |    |     |    |     |    |    |    |    |
| <i>S.paratyphi</i> _SPB7    | 158 | Genes predicted to be involved in toxin-antitoxin system<br>23srRNA genes<br>16srRNA gene<br>oxidoreductases |     |    |     |     |    |     |    |    |    |     |    |     |    |    |    |    |
|                             | 153 |                                                                                                              |     |    |     |     |    |     |    |    |    |     |    |     |    |    |    |    |
|                             | 158 |                                                                                                              |     |    |     |     |    |     |    |    |    |     |    |     |    |    |    |    |
|                             | 208 |                                                                                                              |     |    |     |     |    |     |    |    |    |     |    |     |    |    |    |    |
|                             | 180 |                                                                                                              |     |    |     |     |    |     |    |    |    |     |    |     |    |    |    |    |
|                             | 151 |                                                                                                              |     |    |     |     |    |     |    |    |    |     |    |     |    |    |    |    |
|                             | 151 |                                                                                                              |     |    |     |     |    |     |    |    |    |     |    |     |    |    |    |    |
|                             | 151 |                                                                                                              |     |    |     |     |    |     |    |    |    |     |    |     |    |    |    |    |
|                             | 156 |                                                                                                              |     |    |     |     |    |     |    |    |    |     |    |     |    |    |    |    |
| 151                         |     |                                                                                                              |     |    |     |     |    |     |    |    |    |     |    |     |    |    |    |    |
| 157                         |     |                                                                                                              |     |    |     |     |    |     |    |    |    |     |    |     |    |    |    |    |
