# Supplementary material for: Non-typhoidal Salmonella DNA traces in gallbladder cancer
Source: Infect Agent Cancer. 2016 Mar 3;11:12. doi: 10.1186/s13027-016-0057-x (PMC4776363; doi:10.1186/s13027-016-0057-x)
Supplement: Additional file 5: Figure S3. — Sanger validation of Salmonella read sequences in gall bladder cancer samples Individual read sequences were PCR amplified and Sanger sequencing trace of individual read sequence with their blast output is represented in the figure. (PDF 1437 kb) [file 13027_2016_57_MOESM5_ESM.pdf]

### Sample 15T

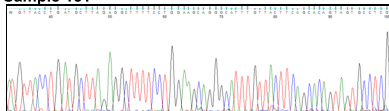

Salmonella enterica subsp. enterica serovar Choleraesuis strain C500, complete genome  
Sequence ID: [gb|CP007639.1](#) Length: 4751585 Number of Matches: 6

| Range: 1: 4093811 to 4093893 |        | <a href="#">GenBank</a>                                      | <a href="#">Graphics</a> |            |
|------------------------------|--------|--------------------------------------------------------------|--------------------------|------------|
| Score                        | Expect | Identities                                                   | Gaps                     | Strand     |
| 137 bits(74)                 | 3e-29  | 170/183(93%)                                                 | 0/83(0%)                 | Plus/Minus |
| Query 15                     |        | TTGGGAGTCTCTTCAGCCCCAGGATGAGATGACGCGCATCTGAGGTTCACAAACCGCCGT | 74                       |            |
| Subject 4093893              |        | TTGGGAGTCTCTTCAGCCCCAGGATGAGATGACGCGCATCTGAGGTTCACAAACCGCCGT | 4093834                  |            |
| Query 75                     |        | CAGATATGACCTCTTGGGCGGAT                                      | 97                       |            |
| Subject 4093833              |        | CAGATATGACCTCTTGGGCGGAT                                      | 4093811                  |            |

### Sample 4T

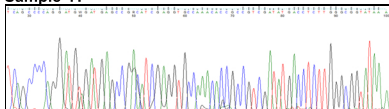

Salmonella enterica subsp. enterica serovar Pullorum str. ATCC 9120, complete genome  
Sequence ID: [gb|CP012347.1|](#) Length: 4694842 Number of Matches: 7

Range 1: 465209 to 465237 [Genbank](#) [Graphs](#) [Next Match](#) [Previous Match](#)

| Score        | Expect | Identities | Gaps     | Strand     |
|--------------|--------|------------|----------|------------|
| 128 bits(69) | 2e-26  | 82/89(92%) | 3/89(3%) | Plus/Minus |

Features: [SRA-Z15.050668.RNA](#)

|               |                                                              |        |
|---------------|--------------------------------------------------------------|--------|
| Query 15      | TCGG...TTTCGGGTCG...TGATTC...TGATTCGCTTGAAGGCTTCCTGGAGCAGGGC | 71     |
| 50-jct 465237 | TCGG...TTTCGGGTCG...GATTTCGATTCGCTTGAAGGCTTCCTGGAGCAGGGC     | 465238 |
| Query 72      | ATTGTGTTACTTCAGCAGCAGTGGCTGCTTGC                             | 100    |
| 50-jct 465237 | ATTGTGTTACTTCAGCAGCAGTGGCTGCTTGC                             | 465209 |

### Sample 9T

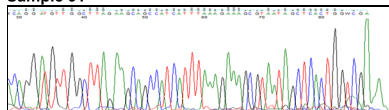

Salmonella enterica subsp. enterica serovar Bareilly str. CFSAN000189, complete genome  
Sequence ID: [gb|CP008053.1|](#) Length: 4730612 Number of Matches: 7

| Score        | Expect | Identities | Gaps     | Strand    |
|--------------|--------|------------|----------|-----------|
| 126 bits(68) | 4e-26  | 76/82(93%) | 1/82(1%) | Plus/Plus |

Features: tRNA-235 ribosomal

|                |                                                             |        |
|----------------|-------------------------------------------------------------|--------|
| Query 7        | CGATGAGG-AGGCGAAGACACACAGGATGTGGCTTAGAAGACAGCATCATTTAAGAA   | 65     |
| Subject 524665 | CGATTGTGGAGAGACACAGACACACAGGATGTGGCTTAGAAGACAGCATCATTTAAGAA | 524664 |
| Query 66       | AGCCTAATAGCTACTGAGGGA                                       | 87     |
| Subject 524665 | AGCCTAATAGCTACTGAGGGA                                       | 524665 |

### Sample 1T

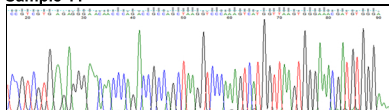

Salmonella enterica subsp. enterica serovar Paratyphi A str. AKU\_12601 complete genome, strain AKU\_12601  
Sequence ID: [emb1FM200053.1](#) Length: 4581797 Number of Matches: 7

| Range 1: 3371134 to 3371222 <a href="#">GenBank</a> <a href="#">Genomes</a> |                                                           |            |          |        |            |
|-----------------------------------------------------------------------------|-----------------------------------------------------------|------------|----------|--------|------------|
| Score                                                                       | Expect                                                    | Ident      | Gaps     | Strand |            |
| 139 bits(75)                                                                | 6e-30                                                     | 85/89(96%) | 4/89(4%) |        | Plus/Minus |
| Features: <a href="#">rRNA_22S_ribosomal</a> <a href="#">rRNA</a>           |                                                           |            |          |        |            |
| Query 61                                                                    | CSA-TGT-ACGTCCTGCTGTGA-GAGGG-ANCAACCGACGCCGACGTAGGTCCTAAA | 61         |          |        |            |
| Subject 3371222                                                             | CSAGTCGTAGCTGCTGCTGTGAAGGAGAAACACACCGACGCCGACGTAGGTCCTAAA | 3371163    |          |        |            |
| Query 62                                                                    | GTTCATGTTTAAGTGGGAAACGATGTGGA                             | 90         |          |        |            |
| Subject 3371162                                                             |                                                           | 3371134    |          |        |            |
